# Supplementary material for: Size-induced variations in bulk/surface structures and their impact on photoluminescence properties of GdVO4:Eu3+ nanoparticles
Source: Royal Society of Chemistry journal article supplement (doi:10.1039/c2cp41136a), 2012-01-01
Supplement: c2cp41136a.pdf [file c2cp41136a.pdf]

## Supporting information

### Size-induced variations in bulk/surface structures and their impacts on photoluminescence properties of $\text{GdVO}_4:\text{Eu}^{3+}$ nanoparticles

Liusai Yang,<sup>a</sup> Liping Li,<sup>b</sup> Minglei Zhao,<sup>a</sup> and Guangshe Li\*<sup>a</sup>

<sup>a</sup> State Key Lab of Structural Chemistry, <sup>b</sup> Key Lab of Optoelectronic Materials Chemistry and Physics, Fujian Institute of Research on the Structure of Matter and Graduate School of Chinese Academy of Sciences; Fuzhou 350002, People's Republic of China.

E-mail: [guangshe@fjirsm.ac.cn](mailto:guangshe@fjirsm.ac.cn);

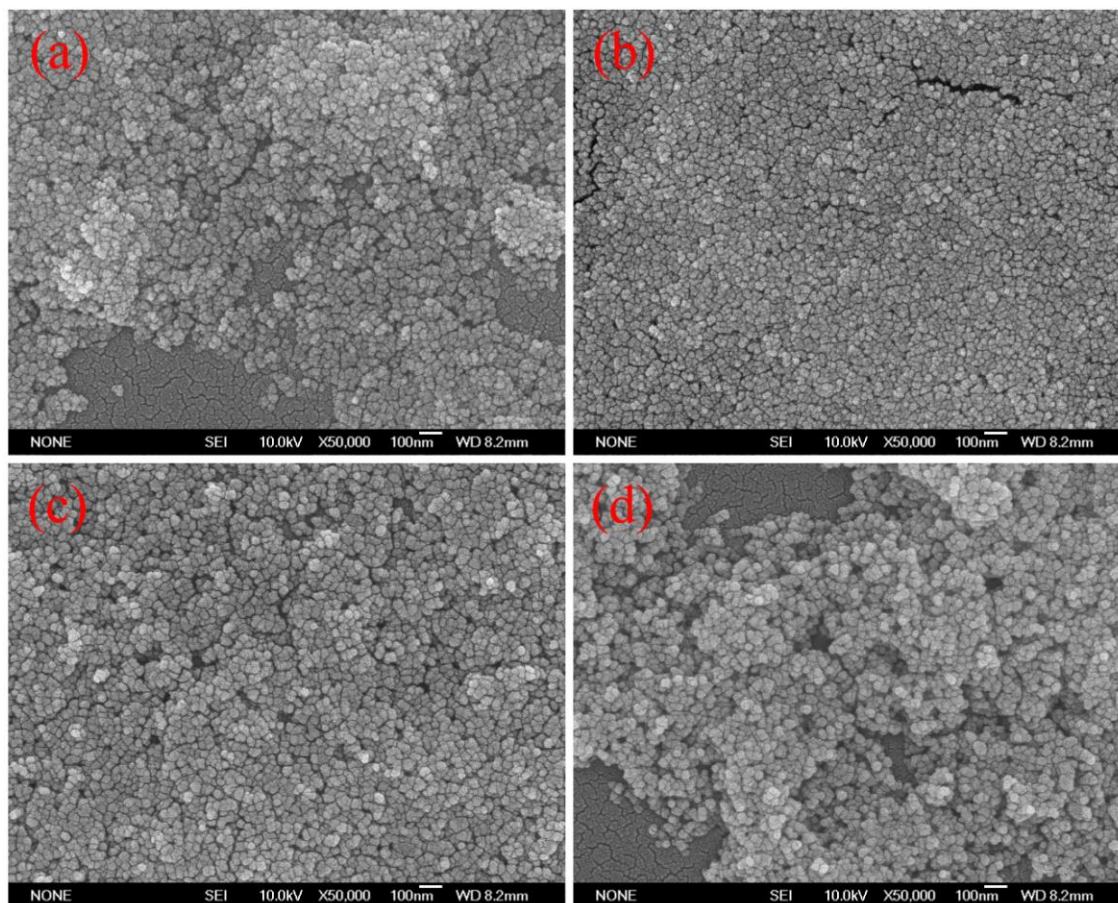

**Figure S1.** SEM images of the  $\text{GdVO}_4:\text{Eu}^{3+}$  ellipsoidal-like nanoparticles prepared at different hydrothermal temperatures: (a) 120, (b) 160, (c) 180, and (d) 220 °C for 12 h.

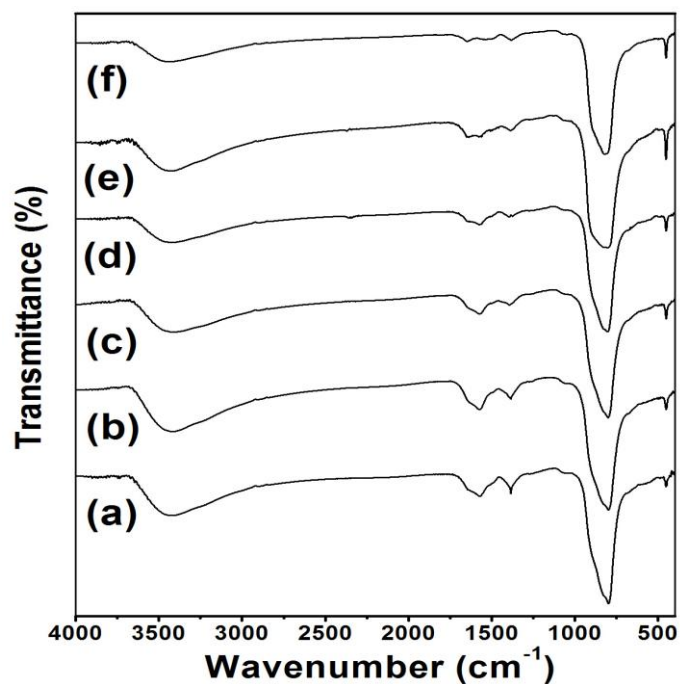

**Figure S2.** FT-IR spectra of the GdVO<sub>4</sub>:Eu<sup>3+</sup> samples prepared at different hydrothermal temperatures: (a) 120, (b) 140, (c) 160, (d) 180, (e) 200, and (f) 220 °C.

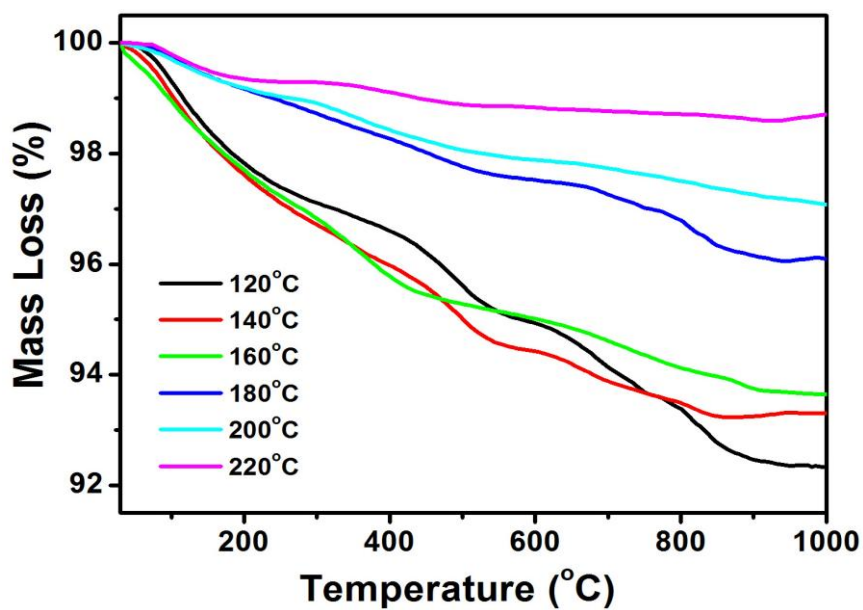

**Figure S3.** TG curves of the GdVO<sub>4</sub>:Eu<sup>3+</sup> samples prepared at different hydrothermal temperatures.

**Table S1.** The fit parameters are by Rietveld refinement.

| Temp.<br>(°C) | R <sub>p</sub> (%) | R <sub>wp</sub> (%) | $\chi^2$ | Slope<br>(%) | Errors<br>(±%) | Weight<br>Loss (%) |
|---------------|--------------------|---------------------|----------|--------------|----------------|--------------------|
| 120           | 8.358              | 11.059              | 1.158    | 0.634        | 0.13           | 7.59               |
| 140           | 8.494              | 11.183              | 1.178    | 0.568        | 0.12           | 6.76               |
| 160           | 8.625              | 11.377              | 1.165    | 0.447        | 0.09           | 6.23               |
| 180           | 8.255              | 11.059              | 1.125    | 0.389        | 0.014          | 3.93               |
| 200           | 8.532              | 11.487              | 1.203    | 0.307        | 0.02           | 2.89               |
| 220           | 8.743              | 11.760              | 1.273    | 0.288        | 0.021          | 1.41               |

**Table S2.** Colour coordinates (CIE), Judd-Ofelt (J-O) parameters ( $\Omega_2$ ) lifetime ( $\tau$ ), asymmetric ratio ( $I_{02}/I_{01}$ ), integrated emission intensity ( ${}^5D_0$ - ${}^7F_2$ ), underlying quantum efficiency ( $\eta\%$ ) and band energy ( $E_g$ ) of different crystallite sizes.

| Crystallite<br>Size (nm) | I <sub>02</sub> /I <sub>01</sub> | $\Omega_2$<br>( $\times 10^{-20} \text{ cm}^2$ ) | CIE   |       | $\tau$ (ms) | ${}^5D_0$ - ${}^7F_2$ | $\eta(\%)$ | E <sub>g</sub> /eV |
|--------------------------|----------------------------------|--------------------------------------------------|-------|-------|-------------|-----------------------|------------|--------------------|
|                          |                                  |                                                  | x     | y     |             |                       |            |                    |
| 14.4                     | 3.844                            | 8.32                                             | 0.458 | 0.355 | 1.097       | 0.280                 | 31.43      | 3.74               |
| 14.9                     | 3.854                            | 8.34                                             | 0.465 | 0.357 | 1.121       | 0.362                 | 32.91      | 3.71               |
| 15.2                     | 3.898                            | 8.44                                             | 0.480 | 0.359 | 1.177       | 0.481                 | 34.30      | 3.67               |
| 17.0                     | 4.020                            | 8.70                                             | 0.495 | 0.359 | 1.221       | 0.689                 | 36.11      | 3.64               |
| 22.2                     | 4.052                            | 8.77                                             | 0.510 | 0.356 | 1.324       | 0.974                 | 38.81      | 3.60               |
| 24.7                     | 4.157                            | 9.00                                             | 0.512 | 0.352 | 1.458       | 1                     | 43.11      | 3.56               |

**Table S3.** Lifetime values obtained after the double-exponential fitting and the single-exponential fitting to the data of GdVO<sub>4</sub>:Eu<sup>3+</sup> ellipsoidal-like nanoparticles of different crystallite sizes.

| Crystallite<br>Size (nm) | Double-exponential fitting |                |               |                |             |                | Single-exponential |                 |
|--------------------------|----------------------------|----------------|---------------|----------------|-------------|----------------|--------------------|-----------------|
|                          | $\tau_1$ (ms)              | A <sub>1</sub> | $\tau_2$ (ms) | A <sub>2</sub> | $\tau$ (ms) | R <sup>2</sup> | $\tau'$ (ms)       | R' <sup>2</sup> |
| <b>14.4</b>              | 1.362                      | 136            | 0.598         | 71             | 1.097       | 0.9965         | 1.028              | 0.9950          |
| <b>14.9</b>              | 1.201                      | 208            | 0.457         | 66             | 1.121       | 0.9981         | 1.037              | 0.9957          |
| <b>15.2</b>              | 1.271                      | 295            | 0.513         | 104            | 1.177       | 0.9987         | 1.082              | 0.9973          |
| <b>17.0</b>              | 1.317                      | 453            | 0.608         | 154            | 1.221       | 0.9991         | 1.136              | 0.9981          |
| <b>22.2</b>              | 1.515                      | 534            | 0.896         | 402            | 1.324       | 0.9995         | 1.232              | 0.9987          |
| <b>24.7</b>              | 2.164                      | 785            | 1.114         | 197            | 1.458       | 0.9995         | 1.278              | 0.9993          |
